# Supplementary material
Source: PubMed Central journal article supplement (PMC2667769)
Supplement: M805029200_1.pdf [file M805029200_1.pdf]

**Supplemental Table SI**

Primer list.

| Primer | Sequence                |
|--------|-------------------------|
| CTA1fw | TGGTCATACCTATAAAATGGTCC |
| CTA1rv | AATCCTGCTGGCAGTAATCTGG  |
| RDN1fw | CCATGGTTTCAACGGGTAACGG  |
| RDN1rv | GCCTTCCTTGGATGTGGTAGCC  |
| ADH2fw | AGTCGCGCCAATCTTGTGTGCT  |
| ADH2rv | ACTCTGTAACCCATCGCCTTAG  |

### Supplemental Table SII

Comparison of the fold changes of the expression of genes that are upregulated in the post-diauxic phase in WT,  $\Delta isc1$  and petite.

| Functionoal Category                      | ORF     | Gene name    | Function                                                                                      | Fold change (24 h/4 h) |               |        | Change ratio          |                |
|-------------------------------------------|---------|--------------|-----------------------------------------------------------------------------------------------|------------------------|---------------|--------|-----------------------|----------------|
|                                           |         |              |                                                                                               | WT                     | $\Delta isc1$ | petite | $\Delta isc1 /$<br>WT | pet/<br>grande |
| non-fermentable carbon source utilization | YKL217W | <i>JEN1</i>  | carboxylic acid transporter protein homolog                                                   | 1921.41                | 37.95         | 42.69  | 0.02                  | 0.02           |
| non-fermentable carbon source utilization | YOR388C | <i>FDH1</i>  | protein with similarity to formate dehydrogenases                                             | 797.55                 | 15.03         | 176.36 | 0.02                  | 0.22           |
| non-fermentable carbon source utilization | YPL276W | <i>FDH2</i>  | putative formate dehydrogenase/putative pseudogene                                            | 685.49                 | 16.41         | 83.93  | 0.02                  | 0.12           |
| non-fermentable carbon source utilization | YNL117W | <i>MLS1</i>  | carbon-catabolite sensitive malate synthase                                                   | 605.87                 | 81.43         | 68.75  | 0.13                  | 0.11           |
| non-fermentable carbon source utilization | YGL205W | <i>POX1</i>  | fatty-acyl coenzyme A oxidase                                                                 | 566.08                 | 49.62         | 8.04   | 0.09                  | 0.01           |
| non-fermentable carbon source utilization | YLR164W |              | strong similarity to Sdh4p                                                                    | 191.13                 | 20.28         | 3.99   | 0.11                  | 0.02           |
| non-fermentable carbon source utilization | YMR303C | <i>ADH2</i>  | alcohol dehydrogenase II                                                                      | 155.99                 | 17.00         | 0.54   | 0.11                  | 0.00           |
| non-fermentable carbon source utilization | YCR010C | <i>ADY2</i>  | acetate transporter required for normal sporulation                                           | 144.57                 | 29.20         | 7.17   | 0.20                  | 0.05           |
| non-fermentable carbon source utilization | YDL085W | <i>NDE2</i>  | mitochondrial external NADH dehydrogenase                                                     | 124.50                 | 30.37         | 30.74  | 0.24                  | 0.25           |
| non-fermentable carbon source utilization | YML042W | <i>CAT2</i>  | carnitine O-acetyltransferase, peroxisomal and mitochondrial                                  | 120.37                 | 21.05         | 65.55  | 0.17                  | 0.54           |
| non-fermentable carbon source utilization | YDR256C | <i>CTA1</i>  | catalase A                                                                                    | 114.77                 | 15.30         | 29.10  | 0.13                  | 0.25           |
| non-fermentable carbon source utilization | YPR002W | <i>PDH1</i>  | protein possibly involved in propionate utilization                                           | 98.11                  | 18.43         | 24.74  | 0.19                  | 0.25           |
| non-fermentable carbon source utilization | YPR001W | <i>CIT3</i>  | mitochondrial isoform of citrate synthase                                                     | 88.94                  | 14.26         | 87.38  | 0.16                  | 0.98           |
| non-fermentable carbon source utilization | YJL153C | <i>INO1</i>  | L-myo-inositol-1-phosphate synthase                                                           | 78.47                  | 13.00         | 3.39   | 0.17                  | 0.04           |
| non-fermentable carbon source utilization | YNR002C | <i>ATO2</i>  | putative transmembrane protein, involved in the export of ammonia                             | 78.42                  | 16.89         | 73.92  | 0.22                  | 0.94           |
| non-fermentable carbon source utilization | YNL202W | <i>SPS19</i> | peroxisomal 2,4-dienoyl-CoA reductase                                                         | 75.51                  | 16.47         | 11.01  | 0.22                  | 0.15           |
| non-fermentable carbon source utilization | YML054C | <i>CYB2</i>  | cytochrome b2                                                                                 | 52.95                  | 13.31         | 9.48   | 0.25                  | 0.18           |
| non-fermentable carbon source utilization | YBR019C | <i>GAL10</i> | UDP-glucose 4-epimerase                                                                       | 28.85                  | 2.05          | 3.21   | 0.07                  | 0.11           |
| non-fermentable carbon source utilization | YPR006C | <i>ICL2</i>  | isocitrate lyase 2-methylisocitrate lyase of the mitochondrial matrix                         | 24.85                  | 4.06          | 0.91   | 0.16                  | 0.04           |
| non-fermentable carbon source utilization | YPL113C |              | glyoxylate reductase                                                                          | 20.94                  | 5.30          | 1.07   | 0.25                  | 0.05           |
| non-fermentable carbon source utilization | YKL221W |              | protein with similarity to mammalian monocarboxylate permeases                                | 19.22                  | 2.06          | 4.05   | 0.11                  | 0.21           |
| nucleotide/nucleoside processing          | YNL014W | <i>HEF3</i>  | translation elongation factor eEF3 homolog                                                    | 54.87                  | 13.74         | 81.98  | 0.25                  | 1.49           |
| nucleotide/nucleoside processing          | YPR193C | <i>HPA1</i>  | histone and other protein acetyltransferase                                                   | 16.17                  | 2.06          | 2.46   | 0.13                  | 0.15           |
| nucleotide/nucleoside processing          | YOR192C | <i>THI72</i> | transporter of thiamine or related compound                                                   | 3.74                   | 0.76          | 1.52   | 0.20                  | 0.41           |
| protein catabolism                        | YGL259W | <i>YPS1</i>  | GPI-anchored aspartic protease                                                                | 29.50                  | 2.52          | 7.78   | 0.09                  | 0.26           |
| others                                    | YBR045C | <i>GIP1</i>  | Glc7-interacting protein.                                                                     | 69.03                  | 5.44          | 10.17  | 0.08                  | 0.15           |
| others                                    | YDL214C | <i>PRR2</i>  | protein kinase with a possible role in MAP kinase signaling in the pheromone response pathway | 67.19                  | 15.36         | 50.31  | 0.23                  | 0.75           |

|         |         |              |                                                                |        |       |        |      |      |
|---------|---------|--------------|----------------------------------------------------------------|--------|-------|--------|------|------|
| others  | YLL016W | <i>SDC25</i> | Ras guanine nucleotide exchange factor (GEF)                   | 18.91  | 3.93  | 47.94  | 0.21 | 2.54 |
| others  | YGR230W | <i>BNS1</i>  | molecular function unknown                                     | 8.41   | 2.09  | 2.03   | 0.25 | 0.24 |
| others  | YOL091W | <i>SPO21</i> | component of the meiotic outer plaque of the spindle pole body | 5.44   | 0.67  | 0.76   | 0.12 | 0.14 |
| others  | YKR102W | <i>FLO10</i> | lectin-like protein with similarity to Flo1p                   | 3.87   | 0.96  | 7.12   | 0.25 | 1.84 |
| unknown | YKL107W |              | molecular function unknown                                     | 628.69 | 55.66 | 58.85  | 0.09 | 0.09 |
| unknown | YIL057C | <i>RGI2</i>  | molecular function unknown                                     | 331.19 | 44.55 | 248.70 | 0.13 | 0.75 |
| unknown | YBR285W |              | molecular function unknown                                     | 323.83 | 23.83 | 1.76   | 0.07 | 0.01 |
| unknown | YLR311C |              | molecular function unknown                                     | 266.93 | 16.72 | 11.66  | 0.06 | 0.04 |
| unknown | YML089C |              | molecular function unknown                                     | 66.59  | 13.13 | 1.25   | 0.20 | 0.02 |
| unknown | YOL131W |              | molecular function unknown                                     | 52.61  | 6.76  | 0.90   | 0.13 | 0.02 |
| unknown | YNL335W | <i>DDI3</i>  | molecular function unknown                                     | 44.07  | 4.95  | 5.48   | 0.11 | 0.12 |
| unknown | YLR053C |              | molecular function unknown                                     | 41.58  | 9.73  | 124.07 | 0.23 | 2.98 |
| unknown | YJR128W |              | molecular function unknown                                     | 38.56  | 6.57  | 19.78  | 0.17 | 0.51 |
| unknown | YHR095W |              | molecular function unknown                                     | 34.37  | 2.31  | 7.44   | 0.07 | 0.22 |
| unknown | YBR046C | <i>ZTA1</i>  | Zeta-crystallin homolog                                        | 27.44  | 5.98  | 2.07   | 0.22 | 0.08 |
| unknown | YER084W |              | molecular function unknown                                     | 26.28  | 5.05  | 5.90   | 0.19 | 0.22 |
| unknown | YBR047W | <i>FMP23</i> | molecular function unknown                                     | 25.87  | 4.08  | 1.34   | 0.16 | 0.05 |
| unknown | YJR061W |              | molecular function unknown                                     | 24.36  | 1.75  | 1.21   | 0.07 | 0.05 |
| unknown | YKL187C |              | molecular function unknown                                     | 23.52  | 4.69  | 46.05  | 0.20 | 1.96 |
| unknown | YPL277C |              | molecular function unknown                                     | 13.01  | 1.09  | 2.47   | 0.08 | 0.19 |
| unknown | YPL277C |              | molecular function unknown                                     | 9.37   | 4.20  | 3.02   | 0.45 | 0.32 |
| unknown | YEL008W |              | molecular function unknown                                     | 8.92   | 1.82  | 2.34   | 0.20 | 0.26 |
| unknown | YPR083W | <i>MDM36</i> | molecular function unknown                                     | 8.78   | 1.82  | 1.35   | 0.21 | 0.15 |
| unknown | YGR045C |              | molecular function unknown                                     | 8.17   | 2.04  | 1.27   | 0.25 | 0.16 |
| unknown | YPL264C |              | molecular function unknown                                     | 8.02   | 0.87  | 1.76   | 0.11 | 0.22 |
| unknown | YLR280C |              | molecular function unknown                                     | 7.92   | 1.26  | 0.68   | 0.16 | 0.09 |
| unknown | YML122C |              | molecular function unknown                                     | 7.18   | 1.45  | 0.68   | 0.20 | 0.09 |
| unknown | YKL037W | <i>AIM26</i> | molecular function unknown                                     | 6.73   | 0.82  | 1.14   | 0.12 | 0.17 |
| unknown | YFL063W |              | molecular function unknown                                     | 6.72   | 1.48  | 2.95   | 0.22 | 0.44 |
| unknown | YOR389W |              | molecular function unknown                                     | 6.10   | 1.68  | 3.02   | 0.28 | 0.50 |
| unknown | YJL160C |              | molecular function unknown                                     | 5.36   | 1.25  | 0.30   | 0.23 | 0.06 |
| unknown | YAR053W |              | molecular function unknown                                     | 4.80   | 1.13  | 1.14   | 0.24 | 0.24 |
| unknown | YIR007W |              | molecular function unknown                                     | 4.58   | 2.03  | 1.86   | 0.44 | 0.41 |

|         |         |                            |      |      |      |      |      |
|---------|---------|----------------------------|------|------|------|------|------|
| unknown | YDR401W | molecular function unknown | 3.35 | 0.76 | 2.18 | 0.23 | 0.65 |
| unknown | YNL034W | molecular function unknown | 2.84 | 0.41 | 1.89 | 0.15 | 0.67 |
| unknown | YKR040C | molecular function unknown | 2.20 | 0.41 | 0.35 | 0.19 | 0.16 |

---

### Supplemental Table SIII

Comparison of the fold changes of the expression of genes that are similarly upregulated in the post-diauxic phase in WT and  $\Delta isc1$ .

| Functional Category              | ORF     | Gene name     | Function                                                                                                                                      | Fold change (24 h/ 4 h Exp. 1) |               | $\Delta isc1$ / WT | Average change ratio (Exp. 1 and 2) |
|----------------------------------|---------|---------------|-----------------------------------------------------------------------------------------------------------------------------------------------|--------------------------------|---------------|--------------------|-------------------------------------|
|                                  |         |               |                                                                                                                                               | WT                             | $\Delta isc1$ | Exp. 1             |                                     |
| nucleotide/nucleoside processing | YJR156C | <i>THI1</i>   | protein involved in synthesis of the thiamine precursor hydroxymethylpyrimidine                                                               | 8.92                           | 8.30          | 0.93               | 0.61                                |
| nucleotide/nucleoside processing | YJL116C | <i>NCA3</i>   | protein that functions with Nca2p to regulate mitochondrial expression of subunits 6 and 8 of the F <sub>0</sub> -F <sub>1</sub> ATP synthase | 8.86                           | 8.45          | 0.95               | 0.57                                |
| nucleotide/nucleoside processing | YMR095C | <i>SNO1</i>   | protein of unconfirmed function, involved in pyridoxine metabolism                                                                            | 6.07                           | 5.51          | 0.91               | 0.67                                |
| nucleotide/nucleoside processing | YOR023C | <i>AHC1</i>   | subunit of the Ada histone acetyltransferase complex                                                                                          | 3.54                           | 3.28          | 0.93               | 0.78                                |
| nucleotide/nucleoside processing | YPL133C | <i>RDS2</i>   | zinc cluster protein involved in conferring resistance to ketoconazole                                                                        | 3.02                           | 2.95          | 0.98               | 0.92                                |
| nucleotide/nucleoside processing | YPL164C | <i>MLH3</i>   | protein involved in DNA mismatch repair                                                                                                       | 2.97                           | 2.77          | 0.93               | 0.88                                |
| nucleotide/nucleoside processing | YLR403W | <i>SFP1</i>   | transcription factor that controls expression of many ribosome biogenesis genes                                                               | 2.87                           | 3.13          | 1.09               | 0.99                                |
| nucleotide/nucleoside processing | YDL200C | <i>MGT1</i>   | DNA repair methyltransferase                                                                                                                  | 2.79                           | 2.86          | 1.02               | 0.77                                |
| nucleotide/nucleoside processing | YBR150C | <i>TBS1</i>   | probable Zn-finger protein                                                                                                                    | 2.79                           | 2.80          | 1.01               | 1.05                                |
| nucleotide/nucleoside processing | YMR201C | <i>RAD14</i>  | protein that recognizes and binds damaged DNA during nucleotide excision repair                                                               | 2.78                           | 2.78          | 1.00               | 0.92                                |
| nucleotide/nucleoside processing | YDR169C | <i>STB3</i>   | protein that binds Sin3p in a two-hybrid assay                                                                                                | 2.77                           | 2.56          | 0.92               | 0.92                                |
| nucleotide/nucleoside processing | YHL027W | <i>RIM101</i> | transcriptional repressor involved in the response to pH                                                                                      | 2.74                           | 2.91          | 1.06               | 0.93                                |
| nucleotide/nucleoside processing | YOR244W | <i>ESAI</i>   | histone acetyltransferase catalytic subunit of the native multisubunit complex                                                                | 2.69                           | 2.46          | 0.91               | 0.87                                |
| nucleotide/nucleoside processing | YKL142W | <i>MRP8</i>   | putative mitochondrial ribosomal protein                                                                                                      | 2.68                           | 2.75          | 1.03               | 1.05                                |
| nucleotide/nucleoside processing | YHL020C | <i>OPI1</i>   | transcriptional regulator of a variety of genes                                                                                               | 2.66                           | 2.75          | 1.04               | 1.04                                |
| nucleotide/nucleoside processing | YGL037C | <i>PNC1</i>   | nicotinamidase that converts nicotinamide to nicotinic acid                                                                                   | 2.57                           | 2.36          | 0.92               | 0.75                                |
| nucleotide/nucleoside processing | YJR035W | <i>RAD26</i>  | protein involved in transcription-coupled repair nucleotide excision repair                                                                   | 2.55                           | 2.41          | 0.94               | 0.83                                |
| nucleotide/nucleoside processing | YPR023C | <i>EAF3</i>   | Esa1p-associated factor                                                                                                                       | 2.49                           | 2.40          | 0.96               | 0.95                                |
| nucleotide/nucleoside processing | YGL181W | <i>GTS1</i>   | protein containing a zinc-finger in the N-terminus and a long Gln-rich region in the C-terminus                                               | 2.40                           | 2.28          | 0.95               | 0.94                                |
| nucleotide/nucleoside processing | YNL025C | <i>SSN8</i>   | cyclin-like component of the RNA polymerase II holoenzyme                                                                                     | 2.36                           | 2.27          | 0.96               | 0.83                                |
| nucleotide/nucleoside processing | YDR480W | <i>DIG1</i>   | regulatory protein of unknown function, pheromone-inducible                                                                                   | 2.34                           | 2.16          | 0.92               | 0.93                                |
| nucleotide/nucleoside processing | YBR119W | <i>MUD1</i>   | U1 snRNP A protein, homolog of human U1-A                                                                                                     | 2.30                           | 2.11          | 0.91               | 1.02                                |
| nucleotide/nucleoside processing | YGL136C | <i>MRM2</i>   | mitochondrial 21S rRNA methyltransferase                                                                                                      | 2.28                           | 2.17          | 0.95               | 0.67                                |
| nucleotide/nucleoside processing | YPL138C | <i>SPP1</i>   | subunit of COMPASS, a complex which methylates histone H3 on lysine 4                                                                         | 2.25                           | 2.25          | 1.00               | 0.95                                |
| nucleotide/nucleoside processing | YOR148C | <i>SPP2</i>   | essential protein that promotes the first step of splicing                                                                                    | 2.25                           | 2.08          | 0.92               | 0.91                                |
| nucleotide/nucleoside processing | YER147C | <i>SCC4</i>   | subunit of cohesin loading factor (Scc2p-Scc4p)                                                                                               | 2.21                           | 2.21          | 1.00               | 0.80                                |

|                                           |         |              |                                                                                                    |      |      |      |      |
|-------------------------------------------|---------|--------------|----------------------------------------------------------------------------------------------------|------|------|------|------|
| nucleotide/nucleoside processing          | YGL035C | <i>MIG1</i>  | transcription factor involved in glucose repression                                                | 2.16 | 2.19 | 1.01 | 0.80 |
| nucleotide/nucleoside processing          | YAL001C | <i>TFC3</i>  | largest of six subunits of the RNA polymerase III transcription initiation factor complex          | 2.16 | 1.97 | 0.91 | 0.88 |
| nucleotide/nucleoside processing          | YNL218W | <i>MGS1</i>  | protein with DNA-dependent ATPase and ssDNA annealing activities                                   | 2.15 | 1.97 | 0.92 | 1.00 |
| nucleotide/nucleoside processing          | YFR034C | <i>PHO4</i>  | basic helix-loop-helix transcription factor                                                        | 2.14 | 1.96 | 0.92 | 0.87 |
| nucleotide/nucleoside processing          | YJR052W | <i>RAD7</i>  | protein that recognizes and binds damaged DNA in an ATP-dependent manner                           | 2.13 | 1.94 | 0.91 | 0.77 |
| nucleotide/nucleoside processing          | YLR323C | <i>CWC24</i> | component of a complex containing Cef1p                                                            | 2.11 | 2.06 | 0.98 | 1.10 |
| nucleotide/nucleoside processing          | YML007W | <i>YAP1</i>  | basic leucine zipper (bZIP) transcription factor required for oxidative stress tolerance           | 2.09 | 2.23 | 1.07 | 0.84 |
| nucleotide/nucleoside processing          | YGL127C | <i>SOH1</i>  | subunit of the RNA polymerase II mediator complex                                                  | 2.08 | 1.90 | 0.91 | 0.89 |
| nucleotide/nucleoside processing          | YNL230C | <i>ELA1</i>  | Elongin A, F-box protein that forms a heterodimer with Elc1p                                       | 2.07 | 1.89 | 0.91 | 0.70 |
| nucleotide/nucleoside processing          | YJR060W | <i>CBF1</i>  | helix-loop-helix protein that binds the motif CACRTG                                               | 2.04 | 1.98 | 0.97 | 1.06 |
| nucleotide/nucleoside processing          | YGR258C | <i>RAD2</i>  | single-stranded DNA endonuclease                                                                   | 2.03 | 2.03 | 1.00 | 0.75 |
| protein catabolism                        | YOR031W | <i>CRS5</i>  | copper-binding metallothionein                                                                     | 8.89 | 8.30 | 0.93 | 0.64 |
| protein catabolism                        | YJL048C | <i>UBX6</i>  | UBX (ubiquitin regulatory X) domain-containing protein that interacts with Cdc48p                  | 3.61 | 3.66 | 1.01 | 0.93 |
| protein catabolism                        | YCL038C | <i>ATG22</i> | protein required for the breakdown of autophagic vesicles in the vacuole                           | 3.25 | 3.03 | 0.93 | 0.80 |
| protein catabolism                        | YDL216C | <i>RRI1</i>  | catalytic subunit of the COP9 signalosome complex                                                  | 3.21 | 3.13 | 0.97 | 0.92 |
| protein catabolism                        | YDR306C |              | ubiquitin-ligase complex                                                                           | 3.07 | 2.99 | 0.97 | 0.81 |
| protein catabolism                        | YBR165W | <i>UBS1</i>  | ubiquitin-conjugating enzyme suppressor                                                            | 2.92 | 2.91 | 1.00 | 0.83 |
| protein catabolism                        | YJR036C | <i>HUL4</i>  | protein with similarity to hect domain E3 ubiquitin-protein ligases                                | 2.63 | 2.69 | 1.02 | 1.14 |
| protein catabolism                        | YDL013W | <i>HEX3</i>  | ring finger protein involved in the DNA damage response with possible recombination role           | 2.49 | 2.34 | 0.94 | 0.97 |
| protein catabolism                        | YKL157W | <i>APE2</i>  | zinc-dependent metallopeptidase yscII                                                              | 2.13 | 2.32 | 1.09 | 0.96 |
| protein catabolism                        | YLL042C | <i>ATG10</i> | E2-like conjugating enzyme that mediates formation of the Atg12p-Atg5p conjugate                   | 2.01 | 2.05 | 1.02 | 0.98 |
| non-fermentable carbon source utilization | YMR256C | <i>COX7</i>  | subunit VII of cytochrome c oxidase                                                                | 3.54 | 3.59 | 1.01 | 1.00 |
| non-fermentable carbon source utilization | YGR183C | <i>QCR9</i>  | subunit 9 of the ubiquinol cytochrome-c reductase complex                                          | 2.62 | 2.77 | 1.05 | 0.94 |
| non-fermentable carbon source utilization | YHR051W | <i>COX6</i>  | subunit VI of cytochrome c oxidase                                                                 | 2.36 | 2.44 | 1.04 | 1.10 |
| non-fermentable carbon source utilization | YPR191W | <i>QCR2</i>  | subunit 2 of the ubiquinol cytochrome-c reductase complex                                          | 2.22 | 2.09 | 0.94 | 0.99 |
| non-fermentable carbon source utilization | YGL187C | <i>COX4</i>  | subunit IV of cytochrome c oxidase                                                                 | 2.15 | 2.32 | 1.08 | 1.10 |
| non-fermentable carbon source utilization | YLR295C | <i>ATP14</i> | subunit h of the F <sub>0</sub> sector of mitochondrial F <sub>1</sub> F <sub>0</sub> ATP synthase | 2.14 | 2.26 | 1.06 | 1.01 |
| amino acid metabolism                     | YMR271C | <i>URA10</i> | one of two orotate phosphoribosyltransferase isozymes                                              | 14.4 | 15.0 | 1.04 | 0.70 |
| amino acid metabolism                     | YLR142W | <i>PUT1</i>  | proline oxidase                                                                                    | 10.7 | 11.5 | 1.08 | 0.74 |
| amino acid metabolism                     | YGL125W | <i>MET13</i> | isozyme of methylenetetrahydrofolate reductase                                                     | 4.36 | 4.01 | 0.92 | 0.84 |
| amino acid metabolism                     | YDR173C | <i>ARG82</i> | protein involved in regulation of arginine-responsive and Mcm1p-dependent genes                    | 2.59 | 2.62 | 1.01 | 1.14 |
| amino acid metabolism                     | YGR019W | <i>UGA1</i>  | $\gamma$ -aminobutyrate transaminase (4-aminobutyrate aminotransferase)                            | 2.53 | 2.58 | 1.02 | 0.83 |
| nutrient uptake                           | YHR096C | <i>HXT5</i>  | hexose transporter with moderate affinity for glucose                                              | 39.5 | 37.7 | 0.96 | 0.50 |

|                 |         |              |                                                                                                            |      |      |      |      |
|-----------------|---------|--------------|------------------------------------------------------------------------------------------------------------|------|------|------|------|
| nutrient uptake | YDR463W | <i>STP1</i>  | transcription factor that activates transcription of amino acid permease genes                             | 2.66 | 2.44 | 0.92 | 1.00 |
| nutrient uptake | YDR342C | <i>HXT7</i>  | high-affinity glucose transporter of the major facilitator superfamily                                     | 2.44 | 2.64 | 1.08 | 0.98 |
| nutrient uptake | YGR065C | <i>VHT1</i>  | high-affinity plasma membrane H <sup>+</sup> -biotin (vitamin H) symporter                                 | 2.15 | 2.05 | 0.96 | 0.74 |
| nutrient uptake | YDR343C | <i>HXT6</i>  | high-affinity glucose transporter of the major facilitator superfamily                                     | 2.10 | 2.08 | 0.99 | 1.02 |
| others          | YJR094C | <i>IME1</i>  | master regulator of meiosis that is active only during meiotic events                                      | 9.92 | 9.77 | 0.98 | 0.63 |
| others          | YDR277C | <i>MTH1</i>  | negative regulator of the glucose-sensing signal transduction pathway                                      | 7.80 | 7.95 | 1.02 | 0.86 |
| others          | YMR169C | <i>ALD3</i>  | cytoplasmic aldehyde dehydrogenase, involved in β-alanine synthesis                                        | 7.43 | 7.71 | 1.04 | 0.67 |
| others          | YPR005C | <i>HAL1</i>  | cytoplasmic protein involved in halotolerance                                                              | 6.35 | 5.87 | 0.92 | 0.70 |
| others          | YPL156C | <i>PRM4</i>  | pheromone-regulated protein                                                                                | 6.03 | 5.71 | 0.95 | 0.83 |
| others          | YOR177C | <i>MPC54</i> | component of the meiotic outer plaque                                                                      | 5.09 | 5.39 | 1.06 | 0.72 |
| others          | YIR029W | <i>DAL2</i>  | allantoicase, converts allantoate to urea and ureidoglycolate                                              | 4.74 | 5.06 | 1.07 | 0.89 |
| others          | YMR068W | <i>AVO2</i>  | component of a complex containing the Tor2p kinase and other proteins                                      | 4.25 | 4.12 | 0.97 | 0.77 |
| others          | YPR154W | <i>PIN3</i>  | protein that induces appearance of [ <i>PIN</i> <sup>+</sup> ] prion when overproduced                     | 4.05 | 3.83 | 0.95 | 0.84 |
| others          | YBR001C | <i>NTH2</i>  | putative neutral trehalase                                                                                 | 3.88 | 3.74 | 0.96 | 0.83 |
| others          | YGR023W | <i>MTL1</i>  | protein with both structural and functional similarity to Mid2p                                            | 3.00 | 2.75 | 0.92 | 0.92 |
| others          | YDL124W |              | NADPH-dependent α-keto amide reductase                                                                     | 2.98 | 2.86 | 0.96 | 0.66 |
| others          | YDR001C | <i>NTH1</i>  | neutral trehalase                                                                                          | 2.84 | 2.77 | 0.97 | 0.77 |
| others          | YLR362W | <i>STE11</i> | signal transducing MEK kinase                                                                              | 2.83 | 3.01 | 1.06 | 0.75 |
| others          | YJL083W | <i>TAX4</i>  | protein involved in regulation of phosphatidylinositol 4,5-bisphosphate concentrations                     | 2.71 | 2.92 | 1.08 | 0.84 |
| others          | YML004C | <i>GLO1</i>  | monomeric glyoxalase I                                                                                     | 2.62 | 2.51 | 0.96 | 0.80 |
| others          | YMR008C | <i>PLB1</i>  | phospholipase B (lysophospholipase)                                                                        | 2.59 | 2.39 | 0.92 | 0.77 |
| others          | YFL053W | <i>DAK2</i>  | dihydroxyacetone kinase                                                                                    | 2.54 | 2.55 | 1.00 | 0.76 |
| others          | YNL173C | <i>MDG1</i>  | plasma membrane protein involved in G-protein mediated pheromone signaling pathway                         | 2.47 | 2.28 | 0.93 | 1.18 |
| others          | YBL045C | <i>COR1</i>  | core subunit of the ubiquinol-cytochrome c reductase complex                                               | 2.46 | 2.61 | 1.06 | 1.34 |
| others          | YPL170W | <i>DAPI</i>  | heme-binding protein involved in regulation of cytochrome P450 protein Erg11p                              | 2.43 | 2.52 | 1.03 | 0.98 |
| others          | YIL153W | <i>RRD1</i>  | peptidyl-prolyl cis-trans isomerase activity                                                               | 2.42 | 2.30 | 0.95 | 0.72 |
| others          | YDR236C | <i>FMN1</i>  | riboflavin kinase, phosphorylates riboflavin to form riboflavin monophosphate                              | 2.42 | 2.35 | 0.97 | 1.01 |
| others          | YHR116W | <i>COX23</i> | mitochondrial intermembrane space protein that functions in mitochondrial copper homeostasis               | 2.41 | 2.48 | 1.03 | 1.22 |
| others          | YOR034C | <i>AKR2</i>  | ankyrin repeat-containing protein similar to Akr1p                                                         | 2.40 | 2.47 | 1.03 | 0.78 |
| others          | YKL198C | <i>PTK1</i>  | putative serine/threonine protein kinase that regulates spermine uptake                                    | 2.38 | 2.25 | 0.94 | 0.73 |
| others          | YLL001W | <i>DNM1</i>  | dynammin-related GTPase required for mitochondrial fission and the maintenance of mitochondrial morphology | 2.37 | 2.31 | 0.97 | 1.03 |
| others          | YCL035C | <i>GRX1</i>  | hydroperoxide and superoxide-radical responsive heat-stable glutathione-dependent disulfide oxidoreductase | 2.35 | 2.43 | 1.04 | 0.90 |
| others          | YJL053W | <i>PEP8</i>  | vacuolar protein sorting protein                                                                           | 2.26 | 2.07 | 0.91 | 0.81 |

|         |         |              |                                                                                                           |      |      |      |      |
|---------|---------|--------------|-----------------------------------------------------------------------------------------------------------|------|------|------|------|
| others  | YML041C | <i>VPS71</i> | required for vacuolar protein sorting                                                                     | 2.24 | 2.32 | 1.03 | 1.00 |
| others  | YLR396C | <i>VPS33</i> | ATP-binding protein that is a subunit of the homotypic vacuole fusion and vacuole protein sorting complex | 2.20 | 2.31 | 1.05 | 1.08 |
| others  | YKL150W | <i>MCR1</i>  | mitochondrial NADH-cytochrome b5 reductase                                                                | 2.18 | 2.05 | 0.94 | 0.87 |
| others  | YOR245C | <i>DGA1</i>  | diacylglycerol acyltransferase                                                                            | 2.17 | 2.24 | 1.03 | 0.87 |
| others  | YPL031C | <i>PHO85</i> | cyclin-dependent kinase                                                                                   | 2.17 | 2.08 | 0.96 | 1.05 |
| others  | YLR371W | <i>ROM2</i>  | GDP/GTP exchange protein for Rho1p and Rho2p                                                              | 2.14 | 2.14 | 1.00 | 0.99 |
| others  | YKL020C | <i>SPT23</i> | ER membrane protein involved, with its homolog Mga2p, in regulation of <i>OLE1</i> transcription          | 2.11 | 2.12 | 1.01 | 0.99 |
| others  | YCR038C | <i>BUD5</i>  | GTP/GDP exchange factor for Rsr1p required for both axial and bipolar budding patterns                    | 2.10 | 1.94 | 0.92 | 1.04 |
| others  | YLR394W | <i>CST9</i>  | protein required for synaptonemal complex formation                                                       | 2.09 | 1.94 | 0.93 | 1.06 |
| others  | YPL002C | <i>SNF8</i>  | component of the ESCRT-II complex                                                                         | 2.08 | 1.92 | 0.93 | 0.91 |
| others  | YIL033C | <i>BCY1</i>  | regulatory subunit of the cyclic AMP-dependent protein kinase                                             | 2.05 | 2.13 | 1.04 | 0.82 |
| others  | YFR033C | <i>QCR6</i>  | subunit 6 of the ubiquinol cytochrome-c reductase complex                                                 | 2.05 | 2.06 | 1.01 | 1.07 |
| others  | YKL161C | <i>MLP1</i>  | protein kinase implicated in the Slf2p mitogen-activated kinase signaling pathway                         | 2.03 | 1.87 | 0.92 | 0.74 |
| unknown | YFL052W |              | strong similarity to Mal63p, YPR196w and Mal13p                                                           | 14.3 | 15.5 | 1.09 | 0.75 |
| unknown | YIL097W | <i>FYV10</i> | molecular function unknown                                                                                | 4.63 | 4.28 | 0.92 | 0.71 |
| unknown | YJL057C | <i>IKS1</i>  | putative serine/threonine kinase                                                                          | 4.02 | 4.45 | 1.11 | 0.91 |
| unknown | YNR073C |              | molecular function unknown                                                                                | 3.99 | 3.89 | 0.97 | 0.73 |
| unknown | YHR150W | <i>PEX28</i> | peroxisomal integral membrane protein                                                                     | 3.56 | 3.64 | 1.02 | 0.82 |
| unknown | YDR358W | <i>GGA1</i>  | golgi-localized protein with homology to gamma-adaptin                                                    | 3.21 | 3.39 | 1.06 | 1.06 |
| unknown | YOR054C | <i>VHS3</i>  | functionally redundant inhibitory subunit of Ppz1p                                                        | 3.10 | 2.88 | 0.93 | 0.68 |
| unknown | YJL151C | <i>SNA3</i>  | integral membrane protein localized to vacuolar intraluminal vesicles                                     | 2.90 | 2.74 | 0.94 | 0.88 |
| unknown | YKL095W | <i>YJU2</i>  | essential nuclear protein                                                                                 | 2.88 | 2.70 | 0.94 | 0.77 |
| unknown | YHR087W |              | molecular function unknown                                                                                | 2.79 | 2.97 | 1.06 | 0.77 |
| unknown | YKL201C | <i>MNN4</i>  | putative positive regulator of mannosylphosphate transferase                                              | 2.43 | 2.47 | 1.02 | 0.74 |
| unknown | YJL210W | <i>PEX2</i>  | peroxisomal membrane protein with a C-terminal zinc-binding RING domain                                   | 2.32 | 2.43 | 1.05 | 1.02 |
| unknown | YBR037C | <i>SCO1</i>  | copper-binding protein of the mitochondrial inner membrane                                                | 2.19 | 2.26 | 1.03 | 0.91 |



### Supplemental Table SIV

Comparison of the fold changes of the expression of genes that are downregulated in the post-diauxic phase in WT and  $\Delta isc1$ .

| Functional Category              | ORF     | Gene name    | Function                                                                                    | Fold change (24 h/ 4 h Exp. 1) |               | $\Delta isc1$ / WT | Average change ratio |
|----------------------------------|---------|--------------|---------------------------------------------------------------------------------------------|--------------------------------|---------------|--------------------|----------------------|
|                                  |         |              |                                                                                             | WT                             | $\Delta isc1$ | Exp. 1             | (Exp. 1 and 2)       |
| nutrient uptake                  | YML123C | <i>PHO84</i> | inorganic phosphate transporter, transmembrane protein                                      | 0.05                           | 1.04          | 18.94              | 11.31                |
| nutrient uptake                  | YGR138C | <i>TPO1</i>  | polyamine transport protein specific for spermine                                           | 0.08                           | 0.56          | 7.37               | 5.55                 |
| nutrient uptake                  | YDR345C | <i>HXT3</i>  | low affinity glucose transporter of the major facilitator superfamily                       | 0.10                           | 0.23          | 2.46               | 2.32                 |
| nutrient uptake                  | YLR214W | <i>FRE1</i>  | ferric (and cupric) reductase                                                               | 0.13                           | 0.50          | 3.88               | 2.88                 |
| nutrient uptake                  | YHR094C | <i>HXT1</i>  | low-affinity glucose transporter of the major facilitator superfamily                       | 0.13                           | 0.32          | 2.50               | 2.43                 |
| nutrient uptake                  | YMR011W | <i>HXT2</i>  | high-affinity glucose transporter of the major facilitator superfamily                      | 0.21                           | 1.41          | 6.87               | 5.24                 |
| nutrient uptake                  | YKL120W | <i>OAC1</i>  | mitochondrial inner membrane transporter, transports oxaloacetate, sulfate, and thiosulfate | 0.21                           | 0.51          | 2.40               | 1.78                 |
| nutrient uptake                  | YPL019C | <i>VTC3</i>  | vacuolar membrane protein involved in vacuolar polyphosphate accumulation                   | 0.24                           | 0.56          | 2.34               | 2.47                 |
| nutrient uptake                  | YMR319C | <i>FET4</i>  | low-affinity Fe(II) transport protein                                                       | 0.29                           | 0.88          | 3.02               | 2.05                 |
| nutrient uptake                  | YJL212C | <i>OPT1</i>  | plasma membrane transporter that transports tetra- and pentapeptides and glutathione        | 0.37                           | 1.12          | 3.03               | 2.43                 |
| nutrient uptake                  | YBR093C | <i>PHO5</i>  | acid phosphatase, repressible                                                               | 0.40                           | 2.02          | 5.06               | 3.31                 |
| nutrient uptake                  | YDL048C | <i>STP4</i>  | involved in pre-tRNA splicing and in uptake of branched-chain amino acids                   | 0.44                           | 1.37          | 3.08               | 2.30                 |
| nutrient uptake                  | YGL255W | <i>ZRT1</i>  | high-affinity zinc transporter of the plasma membrane                                       | 0.57                           | 2.00          | 3.51               | 2.11                 |
| amino acid metabolism            | YLR180W | <i>SAM1</i>  | S-adenosylmethionine synthetase                                                             | 0.10                           | 0.47          | 4.70               | 3.90                 |
| amino acid metabolism            | YAL012W | <i>CYS3</i>  | cystathionine $\gamma$ -lyase                                                               | 0.12                           | 0.66          | 5.28               | 4.75                 |
| amino acid metabolism            | YHR208W | <i>BAT1</i>  | branched-chain amino acid transaminase                                                      | 0.16                           | 0.46          | 2.87               | 2.25                 |
| amino acid metabolism            | YGR155W | <i>CYS4</i>  | cystathionine $\beta$ -synthase                                                             | 0.26                           | 0.69          | 2.66               | 2.23                 |
| amino acid metabolism            | YLR303W | <i>MET17</i> | O-acetylhomoserine-O-acetylserine sulfhydrylase                                             | 0.28                           | 1.72          | 6.04               | 4.75                 |
| amino acid metabolism            | YCL018W | <i>LEU2</i>  | $\beta$ -isopropylmalate dehydrogenase                                                      | 0.32                           | 1.44          | 4.50               | 2.80                 |
| amino acid metabolism            | YDR502C | <i>SAM2</i>  | S-adenosylmethionine synthetase                                                             | 0.34                           | 1.77          | 5.28               | 4.61                 |
| amino acid metabolism            | YKL001C | <i>MET14</i> | adenylylsulfate kinase                                                                      | 0.39                           | 2.67          | 6.85               | 4.77                 |
| amino acid metabolism            | YIL074C | <i>SER33</i> | 3-phosphoglycerate dehydrogenase                                                            | 0.39                           | 1.14          | 2.92               | 2.52                 |
| amino acid metabolism            | YPR167C | <i>MET16</i> | 3-phosphoadenylylsulfate reductase                                                          | 0.44                           | 1.57          | 3.61               | 2.37                 |
| nucleotide/nucleoside processing | YDL227C | <i>HO</i>    | homothallic switching endonuclease                                                          | 0.06                           | 0.19          | 3.11               | 2.52                 |
| nucleotide/nucleoside processing | YGR249W | <i>MGA1</i>  | Mga1p shows similarity to heat shock transcription factor                                   | 0.10                           | 1.24          | 12.72              | 8.67                 |

|                                           |         |                 |                                                                               |      |      |      |      |
|-------------------------------------------|---------|-----------------|-------------------------------------------------------------------------------|------|------|------|------|
| nucleotide/nucleoside processing          | YLR367W | <i>RPS22B</i>   | ribosomal protein S22B                                                        | 0.12 | 0.39 | 3.22 | 2.57 |
| nucleotide/nucleoside processing          | YHR170W | <i>NMD3</i>     | putative Upf1p-interacting protein                                            | 0.15 | 0.40 | 2.64 | 2.17 |
| nucleotide/nucleoside processing          | YDR432W | <i>NPL3</i>     | nuclear shuttling protein with an RNA recognition motif                       | 0.25 | 0.94 | 3.82 | 3.09 |
| nucleotide/nucleoside processing          | YER130C |                 | similarity to Msn2p and weak similarity to Msn4p                              | 0.44 | 1.39 | 3.17 | 2.28 |
| nucleotide/nucleoside processing          | YOR032C | <i>HMS1</i>     | basic helix-loop-helix protein                                                | 0.45 | 2.58 | 5.68 | 4.33 |
| nucleotide/nucleoside processing          | YDR337W | <i>MRPS28</i>   | mitochondrial ribosomal protein MRPS28                                        | 0.49 | 1.11 | 2.27 | 1.87 |
| non-fermentable carbon source utilization | YIL070C | <i>MAM33</i>    | mitochondrial acidic matrix protein                                           | 0.43 | 1.49 | 3.46 | 2.59 |
| non-fermentable carbon source utilization | YNL256W | <i>FOL1</i>     | multifunctional enzyme of the folic acid biosynthesis pathway                 | 0.48 | 0.56 | 1.17 | 1.32 |
| non-fermentable carbon source utilization | Q0280   | <i>COB</i>      | ubiquinol-cytochrome-c reductase subunit (cytochrome B)                       | 0.51 | 1.11 | 2.18 | 1.75 |
| protein catabolism                        | YLR121C | <i>YPS3</i>     | GPI-anchored aspartic protease                                                | 0.40 | 0.93 | 2.35 | 1.70 |
| others                                    | YGL089C | <i>MFALPHA2</i> | $\alpha$ -mating factor                                                       | 0.02 | 0.04 | 2.86 | 4.06 |
| others                                    | YNL141W | <i>AAH1</i>     | adenosine deaminase                                                           | 0.08 | 0.19 | 2.26 | 2.24 |
| others                                    | YDL039C | <i>PRM7</i>     | pheromone-regulated membrane protein                                          | 0.10 | 0.25 | 2.59 | 2.10 |
| others                                    | YBR244W | <i>GPX2</i>     | phospholipid hydroperoxide glutathione peroxidase                             | 0.14 | 0.60 | 4.25 | 3.27 |
| others                                    | YIL118W | <i>RHO3</i>     | ras homolog, GTP binding protein                                              | 0.31 | 0.89 | 2.83 | 2.38 |
| others                                    | YDR297W | <i>SUR2</i>     | syringomycin response protein 2                                               | 0.35 | 1.19 | 3.42 | 2.31 |
| others                                    | YHR136C | <i>SPL2</i>     | protein with similarity to cyclin-dependent kinase inhibitors                 | 0.39 | 1.85 | 4.73 | 4.67 |
| others                                    | YOL016C | <i>CMK2</i>     | Calmodulin-dependent protein kinase                                           | 0.42 | 1.88 | 4.49 | 3.80 |
| others                                    | YJL165C | <i>HAL5</i>     | protein kinase homolog, mutant is salt and pH sensitive                       | 0.43 | 1.54 | 3.56 | 2.53 |
| others                                    | YOR344C | <i>TYE7</i>     | TYE7, a 33 kDa serine-rich protein, is a potential member of the basic region | 0.48 | 1.17 | 2.45 | 1.75 |
| others                                    | YGL143C | <i>MRF1</i>     | mitochondrial polypeptide chain release factor                                | 0.49 | 1.48 | 3.02 | 2.17 |
| others                                    | YIR035C |                 | similarity to human corticosteroid 11- $\beta$ -dehydrogenase                 | 0.49 | 1.16 | 2.37 | 1.82 |
| unknown                                   | YDL037C | <i>BSC1</i>     | strong similarity to glucan 1,4- $\alpha$ -glucosidase                        | 0.06 | 0.34 | 5.87 | 3.39 |
| unknown                                   | YPR157W |                 | strong similarity to YGR141w                                                  | 0.07 | 0.28 | 3.88 | 2.55 |
| unknown                                   | YDL038C |                 | similarity to mucin proteins                                                  | 0.08 | 0.24 | 3.14 | 2.10 |
| unknown                                   | YDR222W |                 | strong similarity to hypothetical protein YLR225c                             | 0.10 | 0.32 | 3.27 | 2.62 |
| unknown                                   | YOL019W |                 | similarity to Rim9p and YFR012w                                               | 0.21 | 0.58 | 2.75 | 2.20 |
| unknown                                   | YDR281C | <i>PHM6</i>     | molecular function unknown                                                    | 0.21 | 1.05 | 4.93 | 4.38 |
| unknown                                   | YDL158C |                 | molecular function unknown                                                    | 0.30 | 0.79 | 2.63 | 2.07 |
| unknown                                   | YOR385W |                 | strong similarity to hypothetical protein YMR316w                             | 0.30 | 0.98 | 3.24 | 3.93 |
| unknown                                   | YLR194C |                 | molecular function unknown                                                    | 0.34 | 2.20 | 6.57 | 5.49 |
| unknown                                   | YDL228C |                 | similarity to <i>A.klebsiana</i> glutamate dehydrogenase                      | 0.35 | 0.82 | 2.34 | 1.75 |

unknown

YJL171C

similarity to YBR162c

0.36

1.39

3.85

2.78

---

**Supplemental Table SV**

Comparison of the fold changes of the expression of genes involved in retrograde response in the pre-diauxic phase of petite and  $\Delta isc1$  relative to their parental strains.

| ORF     | Gene name     | petite/<br>grande | $\Delta isc1$ /<br>WT | Function                                         |
|---------|---------------|-------------------|-----------------------|--------------------------------------------------|
| YOR136W | <i>IDH2</i>   | 5.0               | 1.1±0.1               | isocitrate dehydrogenase subunit II              |
| YLR304C | <i>ACO1</i>   | 4.0               | 0.9±0.3               | aconitase                                        |
| YNL037C | <i>IDH1</i>   | 3.6               | 1.1±0.1               | isocitrate dehydrogenase subunit I               |
| YOR153W | <i>PDR5</i>   | 3.0               | 1.5±0.8               | ABC transporter/multidrug resistance             |
| YLR069C | <i>MEF1</i>   | 2.8               | 0.8±0.1               | mitochondrial translation elongation factor G    |
| YKL096W | <i>CWP1</i>   | 2.5               | 1.2±0.2               | cell wall mannoprotein                           |
| YLR027C | <i>AAT2</i>   | 2.5               | 1.3±0.3               | aspartate aminotransferase                       |
| YML054C | <i>CYB2</i>   | 2.4               | 1.8±0.2               | cytochrome b2                                    |
| YOR020C | <i>HSP10</i>  | 2.4               | 0.9±0.0               | mitochondrial chaperonin                         |
| YIL070C | <i>MAM33</i>  | 2.4               | 0.6±0.0               | required for respiratory growth                  |
| YDR316W | <i>OMS1</i>   | 2.4               | 0.9±0.1               | protein integral to the mitochondrial membrane   |
| YAL060W | <i>BDH1</i>   | 2.4               | 0.9±0.1               | NAD-dependent (2R,3R)-2,3-butanediol             |
| YGR132C | <i>PHB1</i>   | 2.3               | 1.1±0.0               | prohibitin                                       |
| YBR196C | <i>PGI1</i>   | 2.3               | 0.8±0.0               | glucose-6-phosphate isomerase                    |
| YMR272C | <i>SCS7</i>   | 2.3               | 0.8±0.1               | ceramide hydrolase                               |
| YLR259C | <i>HSP60</i>  | 2.2               | 0.9±0.0               | mitochondrial chaperonin                         |
| YPL135W | <i>ISU1</i>   | 2.2               | 1.1±0.1               | ferrous iron binding                             |
| YGR035c |               | 2.2               | 1.5±0.8               | molecular function unknown                       |
| YFR053C | <i>HXK1</i>   | 2.1               | 2.2±0.2               | hexokinase I                                     |
| YDR074W | <i>TPS2</i>   | 2.1               | 0.8±0.2               | trehalose-6-phosphate synthase                   |
| YDR077W | <i>SED1</i>   | 2.1               | 1.2±0.1               | cell surface glycoprotein                        |
| YNL315C | <i>ATP11</i>  | 2.0               | 0.8±0.1               | F <sub>1</sub> -ATPase synthase assembly protein |
| YJR048W | <i>CYC1</i>   | 2.0               | 0.6±0.0               | cytochrome c isoform I                           |
| YEL039C | <i>CYC7</i>   | 2.0               | 1.7±0.1               | cytochrome c isoform II                          |
| YLR163C | <i>MAS1</i>   | 2.0               | 0.9±0.0               | subunit of mitochondrial processing peptidase    |
| YER053C | <i>PIC2</i>   | 2.0               | 1.0±0.1               | mitochondrial phosphate carrier                  |
| YMR145C | <i>NDE1</i>   | 2.0               | 0.8±0.1               | mitochondrial NADH dehydrogenase                 |
| YER062C | <i>HOR2</i>   | 2.0               | 1.6±0.4               | DL-glycerol phosphate phosphatase                |
| YOR152c |               | 2.0               | 1.7±0.3               | molecular function unknown                       |
| YLR258W | <i>GSY2</i>   | 2.0               | 1.1±0.2               | glycogen synthetase isoform 2                    |
| YJL159W | <i>HSP150</i> | 2.0               | 0.9±0.0               | secreted O-glycosylated protein                  |
| YDR055W | <i>PST1</i>   | 2.0               | 1.2±0.3               | similar to the Sps2-Ecm33-YCL048 family          |
| YHR030  | <i>MPK1</i>   | 2.0               | 1.3±0.4               | serine/threonine protein kinase                  |
| YOR354C | <i>MSC6</i>   | 2.0               | 1.5±0.5               | meiotic recombination                            |
